# Supplementary material for: Outcomes of patients with blastoid and pleomorphic variant mantle cell lymphoma
Source: PubMed Central journal article supplement — Blood Adv. 2023 Oct 26;7(24):7393–401. doi: 10.1182/bloodadvances.2023010757 (PMC10758713; doi:10.1182/bloodadvances.2023010757), 2023-10-26
Supplement: BLOODA_ADV-2023-010757-mmc1.pdf [file BLOODA_ADV-2023-010757-mmc1.pdf]

**Supplemental table 1: multivariate analysis excluding patients who did not receive rituximab with induction: progression free survival**

|                                | Hazard ratio | 95% confidence interval, lower limit | 95% confidence interval, upper limit | P value |
|--------------------------------|--------------|--------------------------------------|--------------------------------------|---------|
| Receipt of transplant          | 0.52         | 0.33                                 | 0.82                                 | <0.01   |
| Complete response to induction | 0.29         | 0.16                                 | 0.53                                 | <0.01   |
| MIPI high                      | 3.57         | 1.80                                 | 7.10                                 | <0.01   |
| MIPI unknown                   | 2.82         | 1.55                                 | 5.14                                 | <0.01   |

**Supplemental table 2: reason patients were not transplanted for 93 eligible patients**

|                         | Number (%) |
|-------------------------|------------|
| Investigator preference | 54 (47)    |
| Patients preference     | 17 (15)    |
| Comorbidities           | 13 (11)    |
| Missing                 | 9 (8)      |
